# Supplementary material
Source: PubMed Central journal article supplement (PMC3663894)
Supplement: NIHMS437929-supplement-Supp_4.pdf [file NIHMS437929-supplement-Supp_4.pdf]

# Supplementary Figure 4

WT

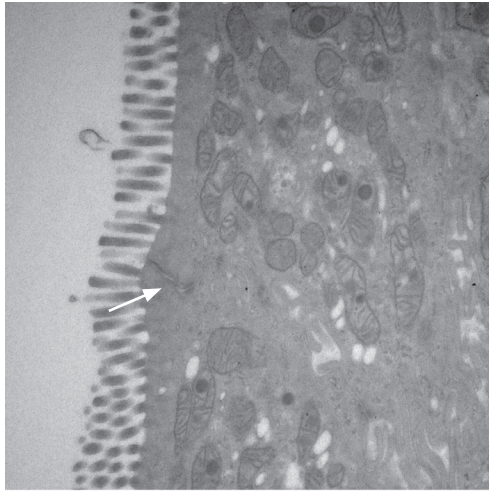

MIG16 TEM.003.tif  
WT apical TJ complex  
Complex #3  
Print Mag: 40200x @ 7.0 in

500 nm  
HV=80.0kV  
Direct Mag: 25000x

*Mtg16*<sup>-/-</sup>

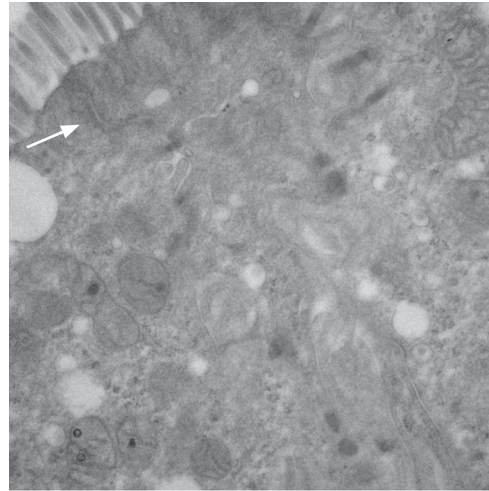

MIG16 TEM.014.tif  
N apical TJ complex grid 1  
complex #3 at 25k  
Print Mag: 40200x @ 7.0 in

500 nm  
HV=80.0kV  
Direct Mag: 25000x

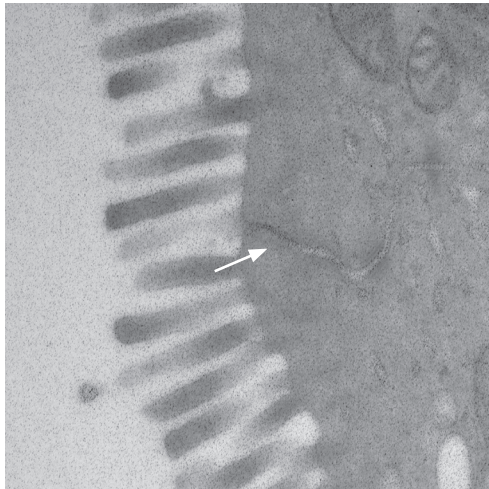

MIG16 TEM.004.tif  
WT apical TJ complex  
Complex #4  
Print Mag: 105000x @ 7.0 in

100 nm  
HV=80.0kV  
Direct Mag: 66000x

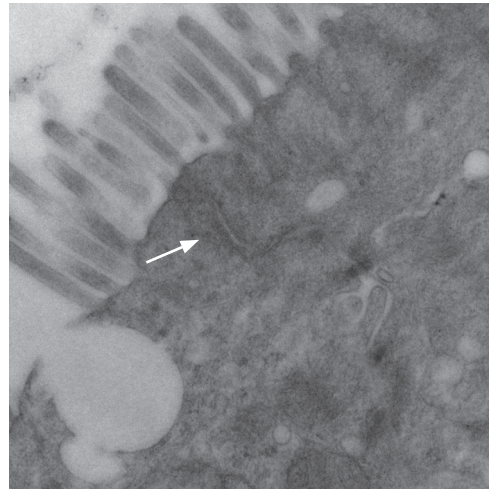

MIG16 TEM.015.tif  
N apical TJ complex grid 1  
complex #3 at 40k  
Print Mag: 64300x @ 7.0 in

500 nm  
HV=80.0kV  
Direct Mag: 40000x
