# Supplementary material
Source: PubMed Central journal article supplement (PMC3663894)

# Supplementary Figure 1

## A

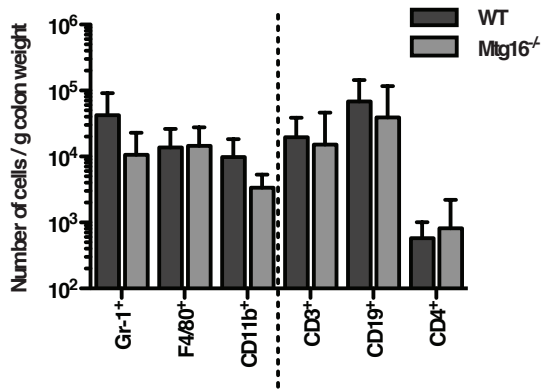

## B

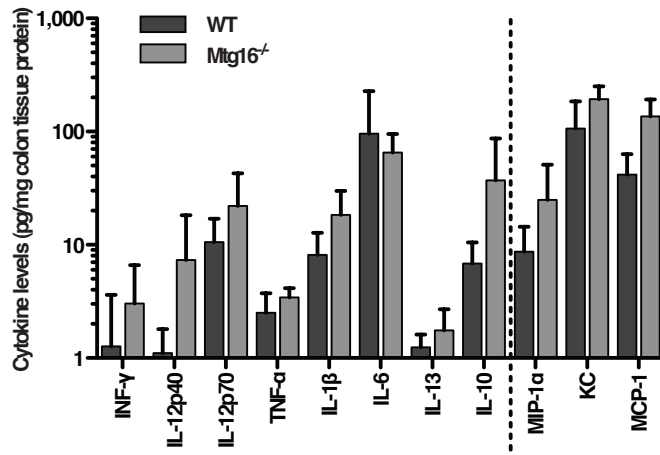

Supplement: NIHMS437929-supplement-Supp_1.pdf [file NIHMS437929-supplement-Supp_1.pdf]

# Supplementary Figure 2

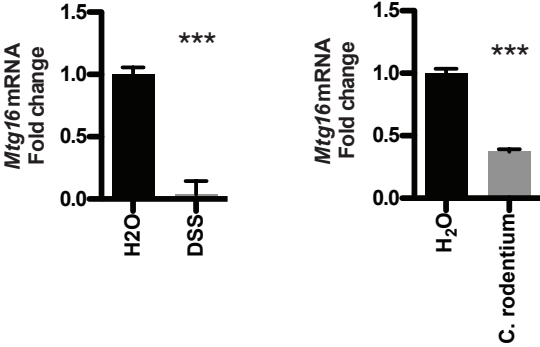

Supplement: NIHMS437929-supplement-Supp_2.pdf [file NIHMS437929-supplement-Supp_2.pdf]

# Supplementary Figure 3

## A

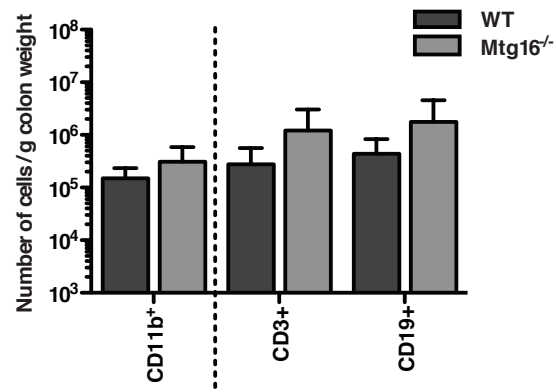

## B

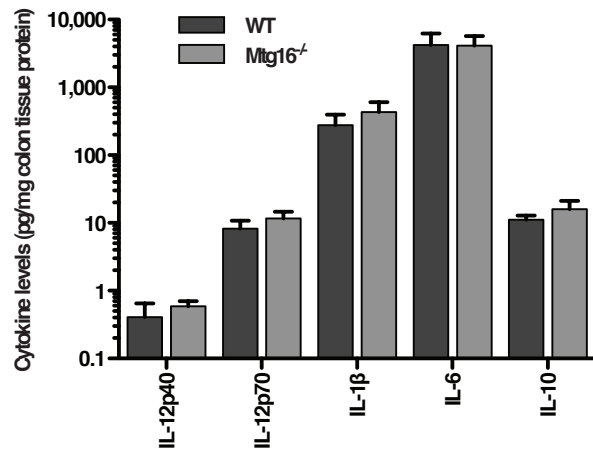

Supplement: NIHMS437929-supplement-Supp_3.pdf [file NIHMS437929-supplement-Supp_3.pdf]
